# Supplementary material for: Direct-Acting Antivirals Reduce the De Novo Development of Esophageal Varices in Patients with Hepatitis C Virus Related Liver Cirrhosis
Source: MDPI journal article supplement (doi:10.3390/v15010252), 2023-01-16
Supplement: s1 [file s1]

Table S1. Comparison of included and excluded participants

| Variables                         | Excluded patients<br>(n = 3093) | Included patients<br>(n = 215) | P-value |
|-----------------------------------|---------------------------------|--------------------------------|---------|
| Sex                               |                                 |                                | 0.572   |
| Female                            | 1660 (53.7%)                    | 111 (51.6%)                    |         |
| Male                              | 1433 (46.3%)                    | 104 (48.4%)                    |         |
| Age (years)                       |                                 |                                |         |
| Mean ( $\pm$ SD)                  | 65.0 ( $\pm$ 11.5)              | 63.3 ( $\pm$ 10.2)             | 0.023   |
| Comorbidity                       |                                 |                                |         |
| Diabetes                          | 1149 (37.2%)                    | 93 (43.3%)                     | 0.080   |
| Dyslipidemia                      | 885 (28.6%)                     | 65 (30.2%)                     | 0.640   |
| Arterial hypertension             | 1556 (50.3%)                    | 123 (57.2%)                    | 0.057   |
| Obesity                           | 125 (4.0%)                      | 13 (6.1%)                      | 0.157   |
| Non-carvedilol beta blocker using |                                 |                                | 0.283   |
| No                                | 2969 (96.0%)                    | 203 (94.4%)                    |         |
| Yes                               | 124 (4.0%)                      | 12 (5.6%)                      |         |
| Platelets (1000/mL)               |                                 |                                | 0.888   |
| <150                              | 1383 (46.7%)                    | 102 (47.4%)                    |         |
| $\geq$ 150                        | 1576 (53.3%)                    | 113 (52.6%)                    |         |
| Missing                           | 134                             | 0                              |         |
| FIB4 score                        |                                 |                                | 0.352   |
| $\leq$ 3.25                       | 1678 (57.0%)                    | 114 (53.5%)                    |         |
| >3.25                             | 1267 (43.0%)                    | 99 (46.5%)                     |         |
| Missing                           | 148                             | 2                              |         |
| MELD score                        |                                 |                                |         |
| Mean ( $\pm$ SD)                  | 6.4 ( $\pm$ 6.2)                | 6.9 ( $\pm$ 6.4)               | 0.206   |
| Missing                           | 500                             | 0                              |         |
| DAA using                         |                                 |                                | 0.771   |
| No                                | 1162 (37.6%)                    | 83 (38.6%)                     |         |
| Yes                               | 1931 (62.4%)                    | 132 (61.4%)                    |         |

Abbreviations: SD: standard deviation;
